# Supplementary material for: Synthesis and characterization of responsive poly(anionic liquid) microgels
Source: Royal Society of Chemistry journal article supplement (doi:10.1039/c6py01282e), 2016-01-01
Supplement: c6py01282e1.pdf [file c6py01282e1.pdf]

## Electronic Supplementary Information (ESI)

### Synthesis and characterization of responsive poly(anionic liquid) microgels

Shoumin Chen,<sup>a</sup> Yahui Peng,<sup>a</sup> Qingshi Wu,<sup>a</sup> Aiping Chang,<sup>a</sup> Anqi Qu,<sup>a</sup> Jing Shen,<sup>b</sup> Jianda Xie,<sup>c</sup> Zahoor Hussain Farooqi,<sup>d</sup> and Weitai Wu<sup>\*a</sup>

<sup>a</sup> State Key Laboratory for Physical Chemistry of Solid Surfaces, Collaborative Innovation Center of Chemistry for Energy Materials, and Department of Chemistry, College of Chemistry and Chemical Engineering, Xiamen University, Xiamen, Fujian 361005, China. E-mail: wuwt@xmu.edu.cn

<sup>b</sup> Department of Applied Chemistry, College of Vocational Education, Yunnan Normal University, Kunming, Yunnan 650092, China

<sup>c</sup> School of Materials Science and Engineering, Xiamen University of Technology, Xiamen, Fujian 361024, China

<sup>d</sup> Institute of Chemistry, University of the Punjab, New Campus, Lahore 54590, Pakistan

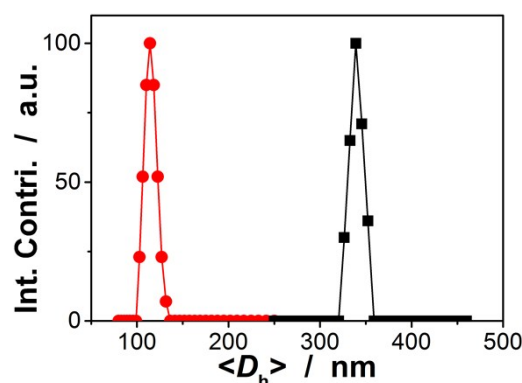

**Fig. S1** DLS size distribution of the microgels synthesized with different feeding amount of SDS (■: 0 g; ●: 0.0150 g). The feeding amounts of TPSS and MBAAm were set to 0.7843 g and 0.0113 g, respectively, in the synthesis. All measurements were made on 10.0 µg/mL microgel aqueous solutions at 25.0 °C.

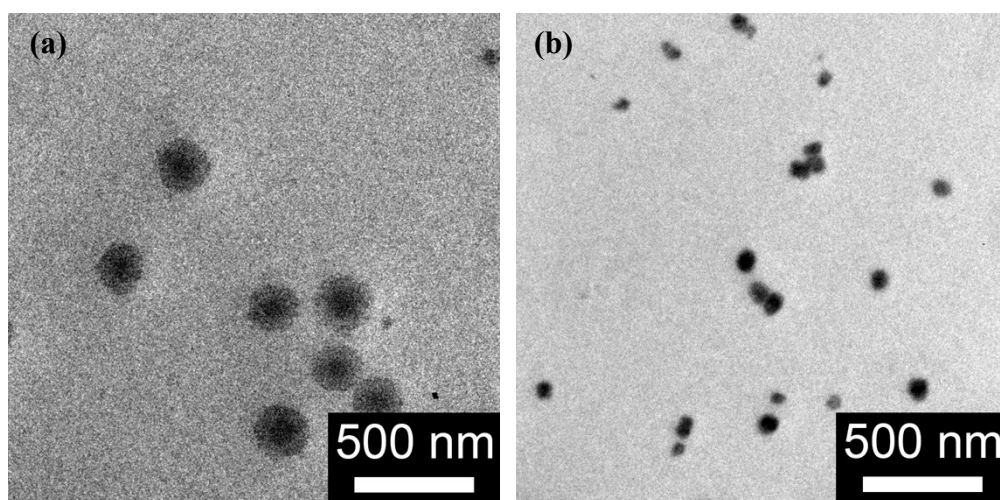

**Fig. S2** TEM images of the microgels synthesized with different feeding amount of SDS: (a) 0 g and (b) 0.0150 g. The feeding amounts of TPSS and MBAAm were set to 0.7843 g and 0.0113 g, respectively, in the synthesis.

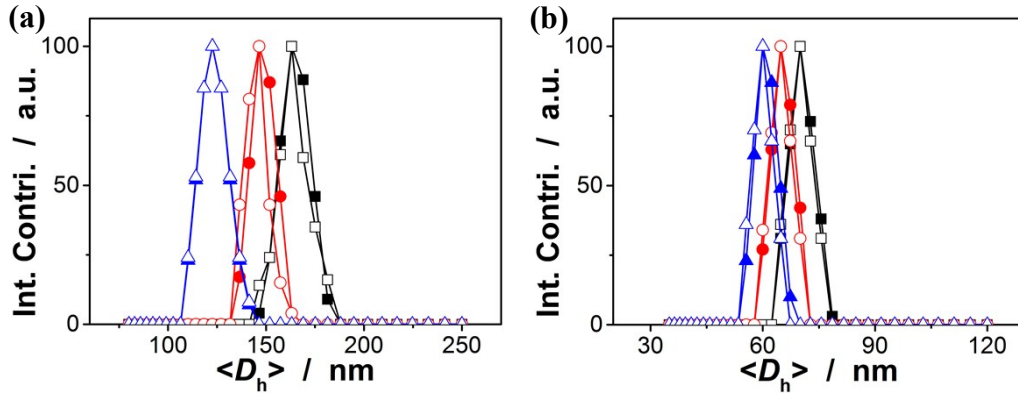

**Fig. S3** DLS size distribution of (a) PTPSS microgels and (b) CPIL microgels in water at 25.0 °C (■,□), 43.0 °C (●,○), and 61.0 °C (▲,△), respectively, upon heating (solid symbols) and cooling (open symbols) cycle. All measurements were made on 10.0 µg/mL microgel aqueous solutions.

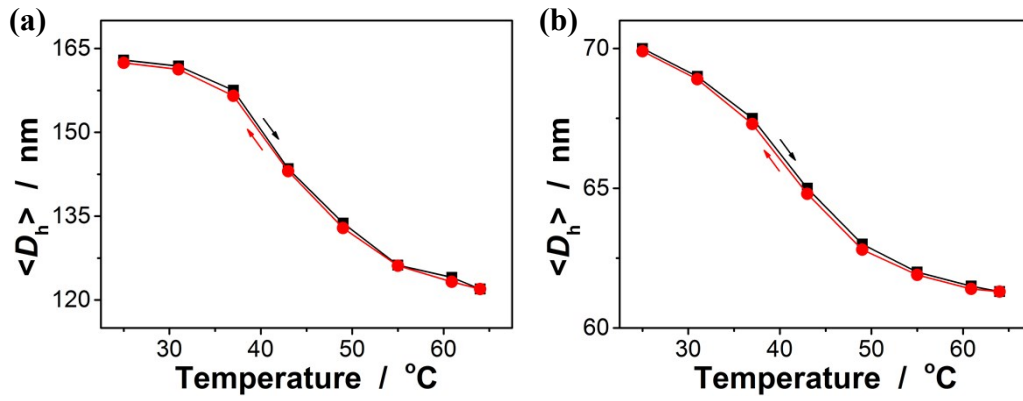

**Fig. S4** Temperature-dependent  $\langle D_h \rangle$  of (a) PTPSS microgels and (b) CPIL microgels in water upon heating and cooling. All measurements were made on 10.0 µg/mL microgel aqueous solutions.

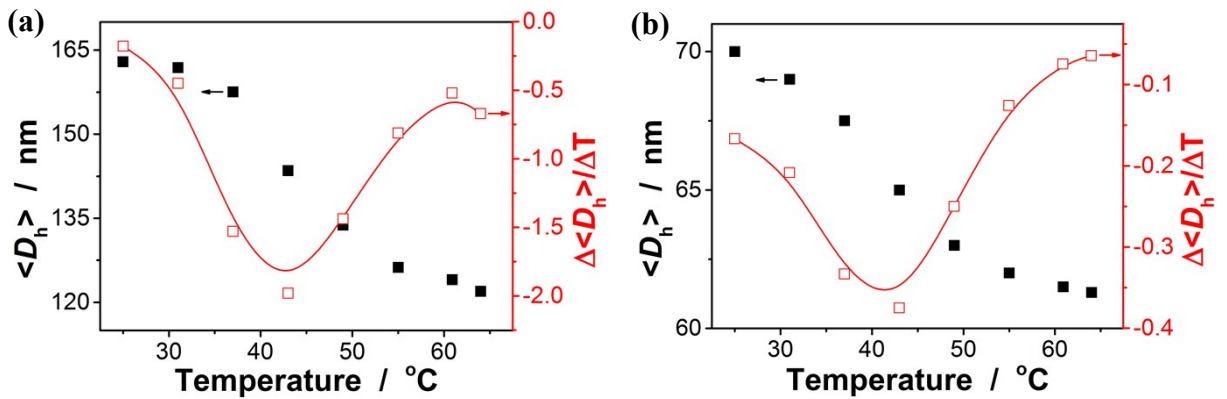

**Fig. S5** Typical  $\Delta\langle D_h \rangle/\Delta T$ – $T$  plots of (a) PTPSS microgels and (b) CPIL microgels in water. All measurements were made on 10.0 µg/mL microgel aqueous solutions.

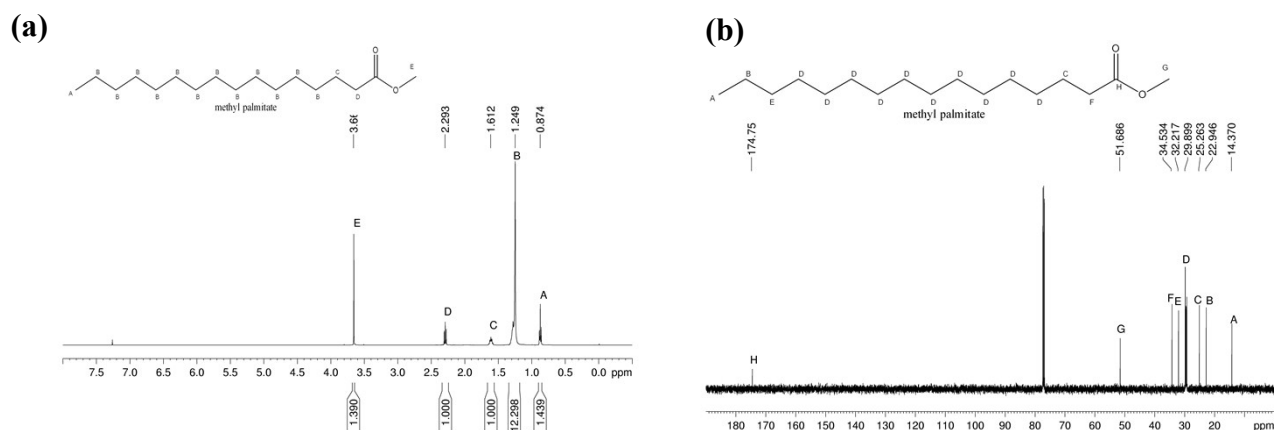

**Fig. S6** (a)  $^1\text{H}$  NMR and (b)  $^{13}\text{C}$  NMR spectra of methyl palmitate yielded from the model reactions.  $\text{CDCl}_3$  was used as the d-solvent.

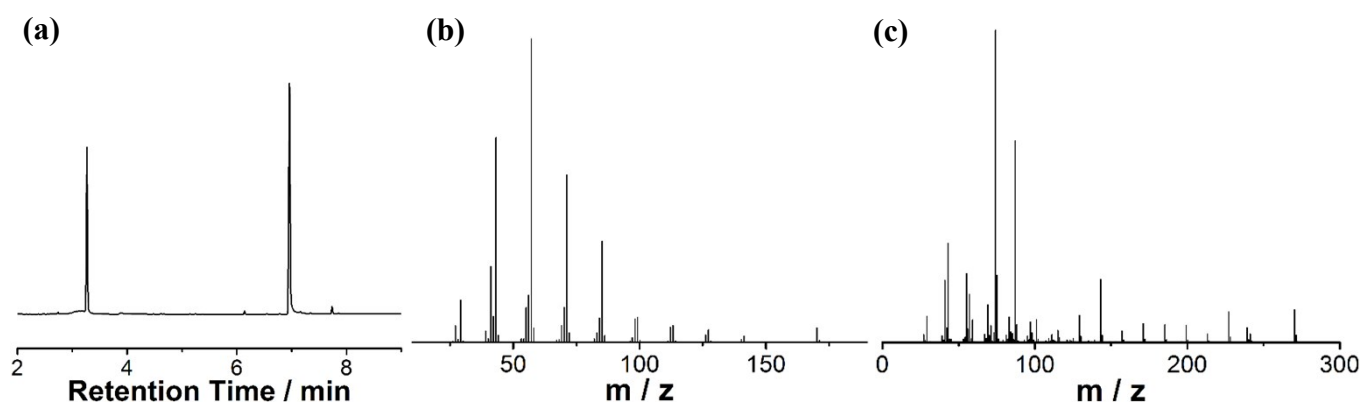

**Fig. S7** GC-MS analysis of methyl palmitate yielded from the model reactions: typical (a) GC spectrum of methyl palmitate mixed with dodecane, which is used as an internal standard substance, and MS spectra corresponding to the GC peaks at 3.27 min (b; dodecane) and 6.96 min (c; methyl palmitate).

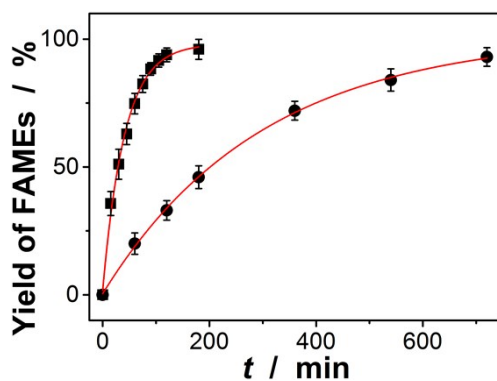

**Fig. S8** Time trace of yield of FAMES during the model reactions catalyzed by free  $-\text{SO}_3\text{H}$  (by adding 0.1 mmol benzenesulfonic acid and  $6.9 \times 10^{-2}$  mmol TPSS directly) at 65 °C. The lines are exponential fits.

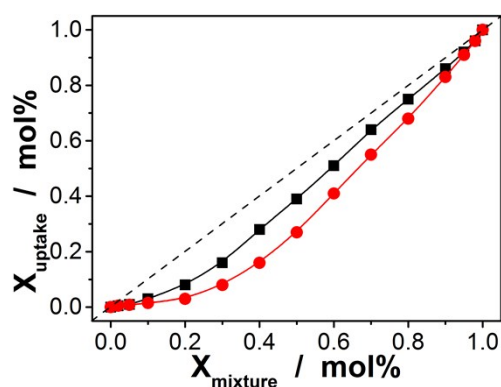

**Fig. S9** A comparison of the uptaken mol fraction of methyl palmitate (■) and glycerol (●) in the equilibrated CPIL microgels in the presence of methanol at a constant temperature (at 65 °C oil bath), and the corresponding mol fractions in the initial bath mixtures.

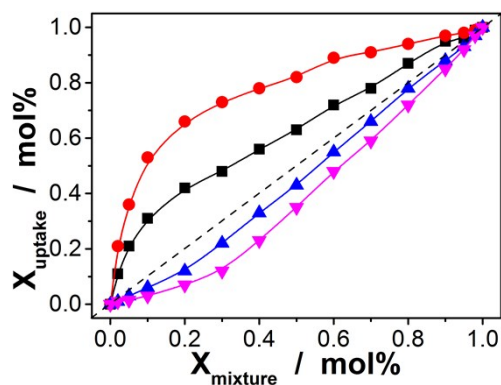

**Fig. S10** A comparison of the uptaken mol fraction of PA (■), tripalmitin (●), methyl palmitate (▲), and glycerol (▼) in the equilibrated PTPSS microgels in the presence of methanol at a constant temperature (at 65 °C oil bath), and the corresponding mol fractions in the initial bath mixtures.

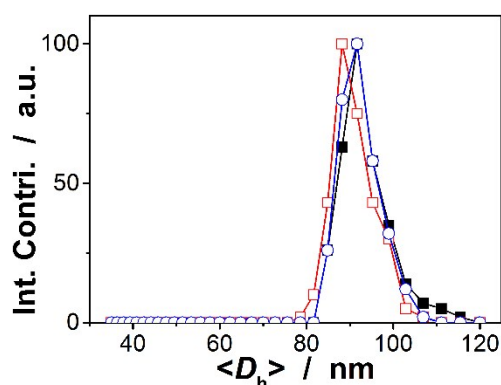

**Fig. S11** DLS size distribution for CPIL microgels before (■) and after five cycles' of use for the model esterification reaction of PA (□) and the transesterification reaction of tripalmitin (○). DLS measurements were made in methanol at 25.0 °C.

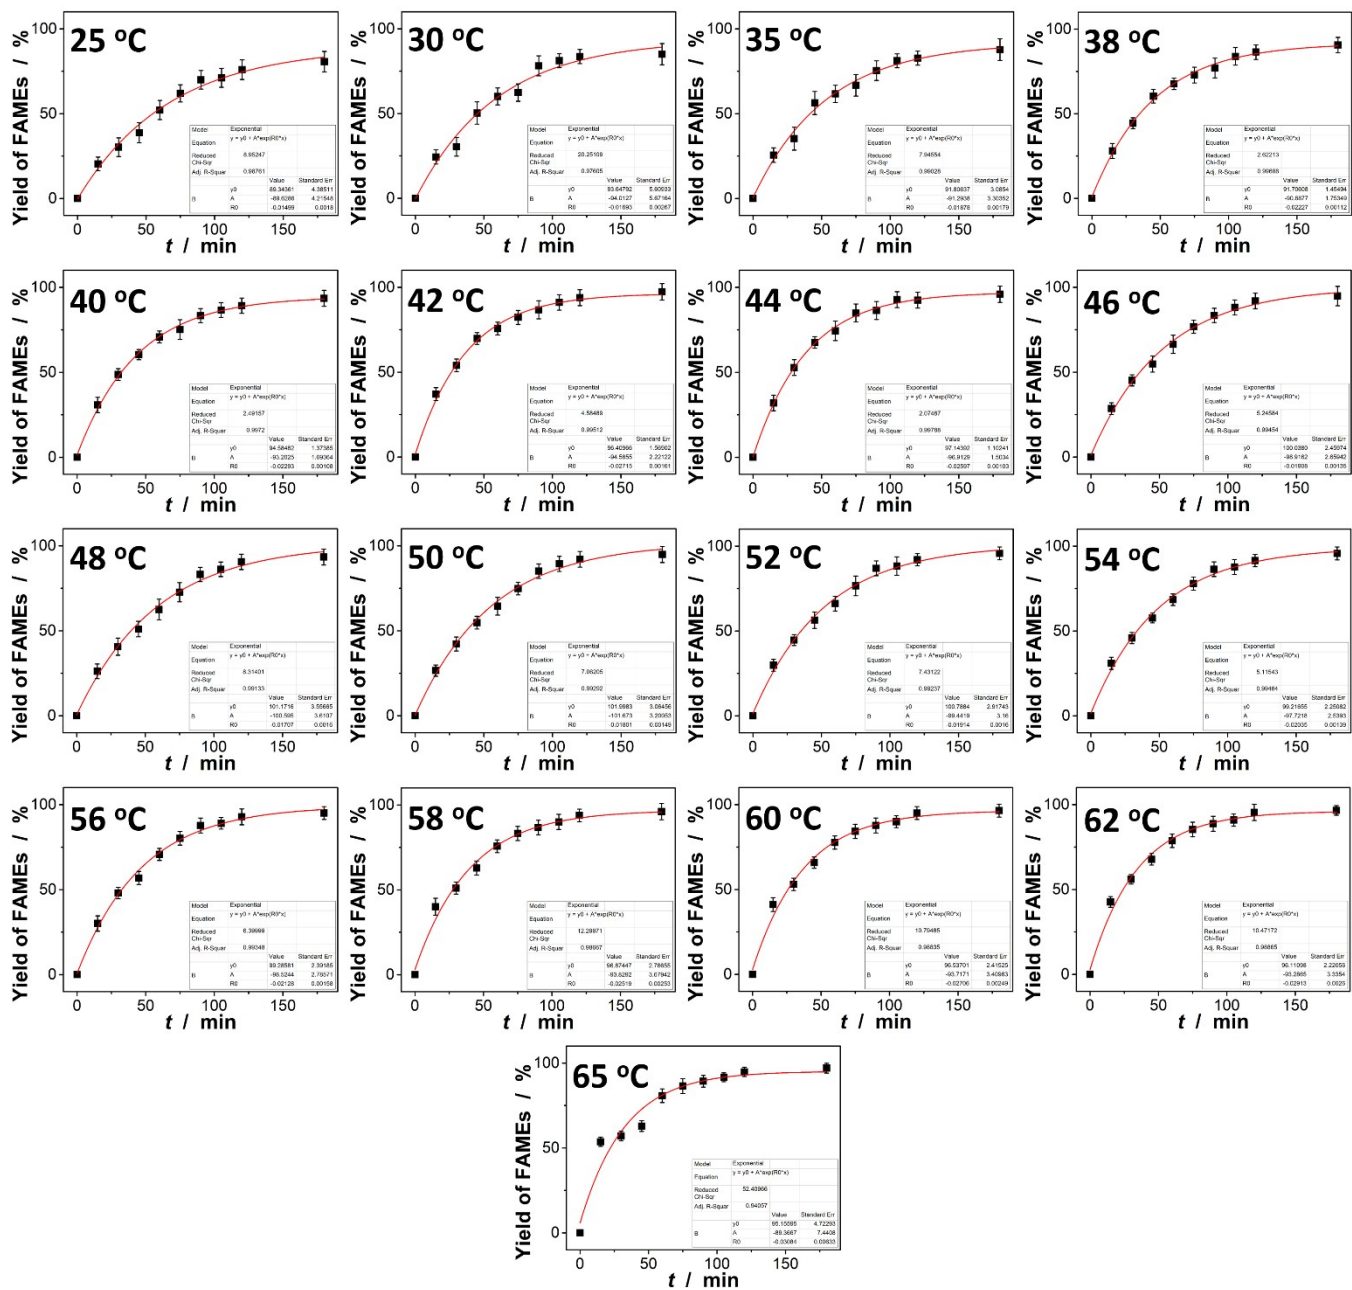

**Fig. S12** Time trace of the yield of FAMES during the model esterification reaction of PA catalyzed by CPIL microgels at different temperatures. Results are mean  $\pm$  SD ( $n = 3$ ). The lines are exponential fits.

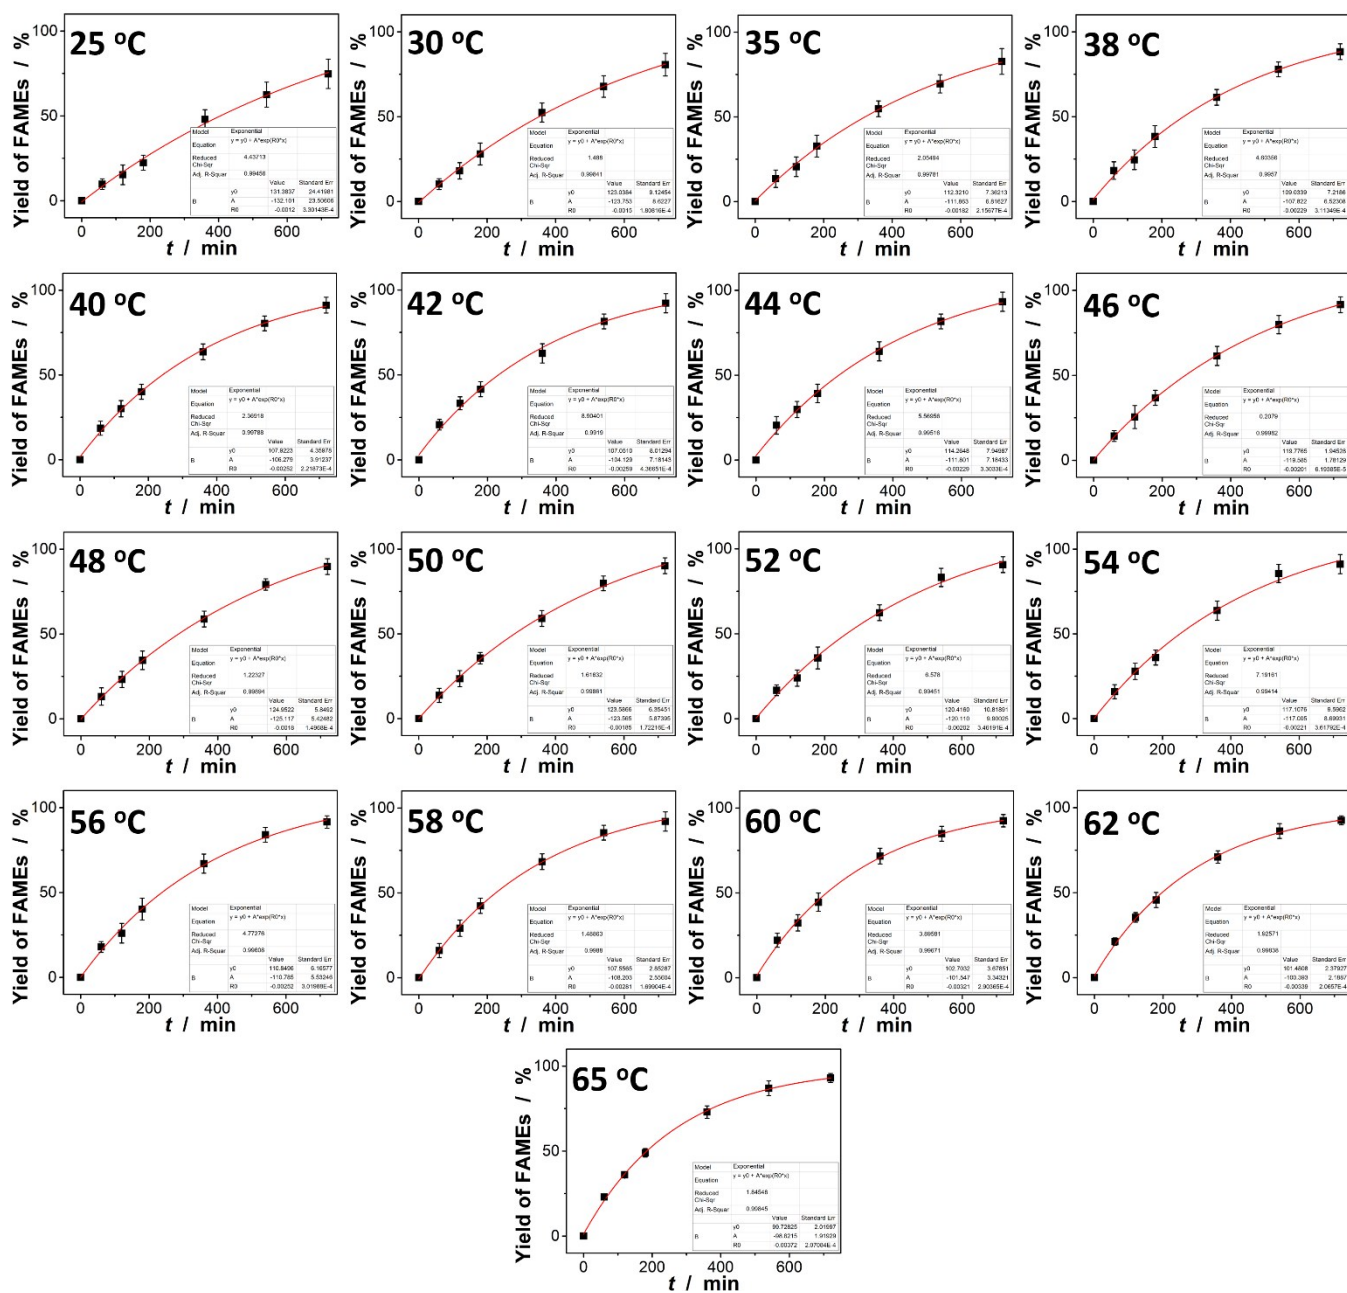

**Fig. S13** Time trace of the yield of FAMES during the model transesterification reaction of tripalmitin catalyzed by CPIL microgels at different temperatures. Results are mean  $\pm$  SD ( $n = 3$ ). The lines are exponential fits.

**Table S1.** Additional results on the model esterification/transesterification reactions over CPIL microgels.

| entry | reaction conditions           |                             |                 |                     |             | yield of FAMEs |
|-------|-------------------------------|-----------------------------|-----------------|---------------------|-------------|----------------|
|       | methanol / water<br>(mL / mL) | PA / tripalmitin<br>(g / g) | CPIL<br>(g)     | temperature<br>(°C) | time<br>(h) |                |
| 1     | 1.00 / 0.00                   | 0.5128 / 0.0000             | 0.0500          | 65                  | 18          | > 99           |
|       |                               |                             |                 |                     | 10          | > 99           |
| 2     | 1.00 / 0.00                   | 0.5128 / 0.0000             | 0.0100          | 65                  | 18          | > 99           |
|       |                               |                             |                 |                     | 10          | > 99           |
| 3     | 1.00 / 0.00                   | 0.5128 / 0.0000             | 0.0050          | 65                  | 18          | 83             |
|       |                               |                             |                 |                     | 10          | 82             |
| 4     | 1.00 / 0.00                   | 0.5128 / 0.0000             | 0.0010          | 65                  | 18          | 88             |
|       |                               |                             |                 |                     | 10          | 88             |
| 5     | 1.00 / 0.00                   | 0.5128 / 0.0000             | 0.0005          | 65                  | 18          | 95             |
|       |                               |                             |                 |                     | 10          | 94             |
| 6     | 0.90 / 0.10                   | 0.5128 / 0.0000             | 0.0500          | 65                  | 18          | 99             |
| 7     | 0.85 / 0.15                   | 0.5128 / 0.0000             | 0.0500          | 65                  | 18          | 93             |
| 8     | 0.80 / 0.20                   | 0.5128 / 0.0000             | 0.0500          | 65                  | 18          | 76             |
| 9     | 0.75 / 0.25                   | 0.5128 / 0.0000             | 0.0500          | 65                  | 18          | 69             |
| 10    | 0.70 / 0.30                   | 0.5128 / 0.0000             | 0.0500          | 65                  | 18          | 49             |
| 11    | 1.00 / 0.00                   | 0.0000 / 0.5651             | 0.0500          | 65                  | 18          | > 99           |
|       |                               |                             |                 |                     | 10          | 89             |
| 12    | 1.00 / 0.00                   | 0.0000 / 0.5651             | 0.0100          | 65                  | 18          | 96             |
|       |                               |                             |                 |                     | 10          | 85             |
| 13    | 1.00 / 0.00                   | 0.0000 / 0.5651             | 0.0050          | 65                  | 18          | 89             |
|       |                               |                             |                 |                     | 10          | 77             |
| 14    | 1.00 / 0.00                   | 0.0000 / 0.5651             | 0.0010          | 65                  | 18          | 88             |
|       |                               |                             |                 |                     | 10          | 75             |
| 15    | 1.00 / 0.00                   | 0.0000 / 0.5651             | 0.0005          | 65                  | 18          | 90             |
|       |                               |                             |                 |                     | 10          | 76             |
| 16    | 0.90 / 0.10                   | 0.0000 / 0.5651             | 0.0500          | 65                  | 18          | 98             |
| 17    | 0.85 / 0.15                   | 0.0000 / 0.5651             | 0.0500          | 65                  | 18          | 86             |
| 18    | 0.80 / 0.20                   | 0.0000 / 0.5651             | 0.0500          | 65                  | 18          | 75             |
| 19    | 0.75 / 0.25                   | 0.0000 / 0.5651             | 0.0500          | 65                  | 18          | 70             |
| 20    | 0.70 / 0.30                   | 0.0000 / 0.5651             | 0.0500          | 65                  | 18          | 56             |
| 21    | 1.00 / 0.00                   | 0.5128 / 0.0000             | —— <sup>a</sup> | 65                  | 18          | > 99           |
|       |                               | 0.0000 / 0.5651             | —— <sup>a</sup> | 65                  | 18          | > 99           |

<sup>a</sup> By adding  $1.2 \times 10^{-1}$  mmol benzenesulfonic acid and  $6.9 \times 10^{-2}$  mmol TPSS directly, with the amounts close to those of  $-\text{SO}_3\text{H}$  and TPSS on the 50.0 mg CPIL microgels.

**Table S2.** Physical properties of the waste cooking oil used for the biodiesel production.

| property           | unit               | test method  | waste cooking oil |
|--------------------|--------------------|--------------|-------------------|
| acid value         | mg KOH/g           | pr EN 14104  | 2.37              |
| water content      | mg/kg              | EN ISO 12937 | trace             |
| viscosity at 40 °C | mm <sup>2</sup> /s | EN ISO 3104  | 31.05             |
| density at 15 °C   | g/cm <sup>3</sup>  | EN ISO 3675  | 0.92              |
| flash point        | °C                 | ISO CD 3679c | 270               |

**Table S3.** Composition of fatty acids of the waste cooking oil used for the biodiesel production.<sup>a</sup>

| fatty acid (methyl ester) | C12:0 | C14:0 | C16:0 | C16:1 | C18:0 | C18:1 | C18:2 | C18:3 | C20:0 | C20:1 |
|---------------------------|-------|-------|-------|-------|-------|-------|-------|-------|-------|-------|
| waste cooking oil (wt%)   | 0.35  | 0.18  | 58.36 | 1.90  | 1.29  | 30.12 | 1.56  | 5.71  | 0.21  | 0.32  |

<sup>a</sup> Results are mean values ( $n = 3$ ).**Table S4.** Some common properties of the biodiesel produced from the waste cooking oil.

| property           | unit               | test method  | the yielded biodiesel | EN 14214 specification | conventional diesel (0#) in China |
|--------------------|--------------------|--------------|-----------------------|------------------------|-----------------------------------|
| acid value         | mg KOH/g           | pr EN 14104  | 0.12                  | <0.5                   | 0.07                              |
| water content      | mg/kg              | EN ISO 12937 | 391                   | <500                   | trace                             |
| viscosity at 40 °C | mm <sup>2</sup> /s | EN ISO 3104  | 4.52                  | 3.5-5.0                | 3.0-8.0                           |
| density at 15 °C   | g/cm <sup>3</sup>  | EN ISO 3675  | 0.88                  | 0.86-0.90              | 0.82-0.85                         |
| flash point        | °C                 | ISO CD 3679c | 157                   | >101                   | >55                               |
